# Supplementary material for: A comparison of food sources of nudibranch mollusks at different depths off the Kuril Islands using fatty acid trophic markers
Source: PubMed Central journal article supplement (PMC8627124; doi:10.7717/peerj.12336), 2021-11-24

Non-metric MDS

Resemblance: S17 Bray-Curtis similarity

2D Stress: 0,06

Species

- ▲ CV
- ▼ AP
- CP
- ◆ TS
- TS-
- + DS

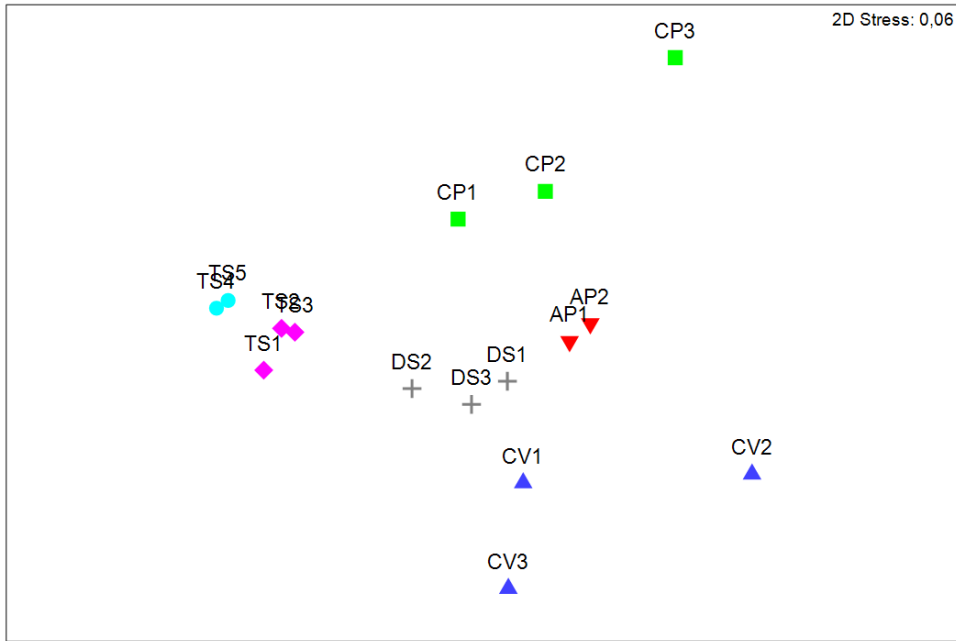

Supplement: peerj-09-12336-s003.pdf [file peerj-09-12336-s003.pdf]
