# Supplementary material for: A comparison of food sources of nudibranch mollusks at different depths off the Kuril Islands using fatty acid trophic markers
Source: PubMed Central journal article supplement (PMC8627124; doi:10.7717/peerj.12336), 2021-11-24

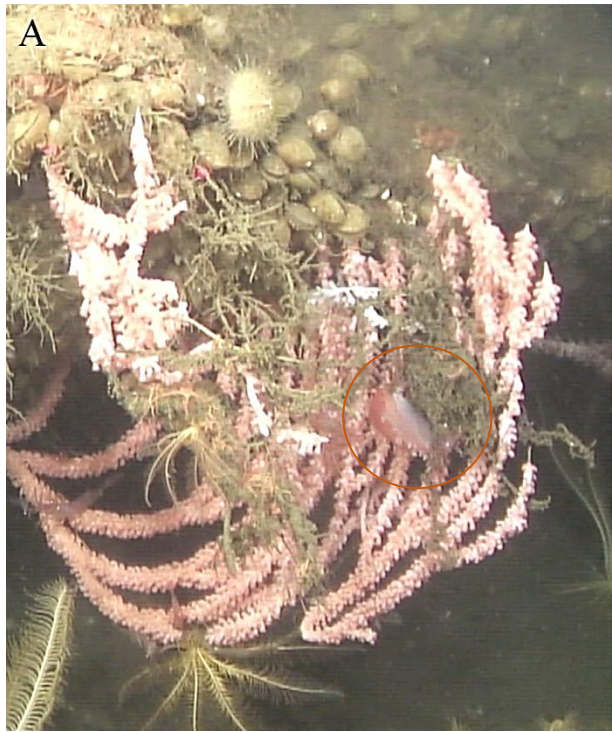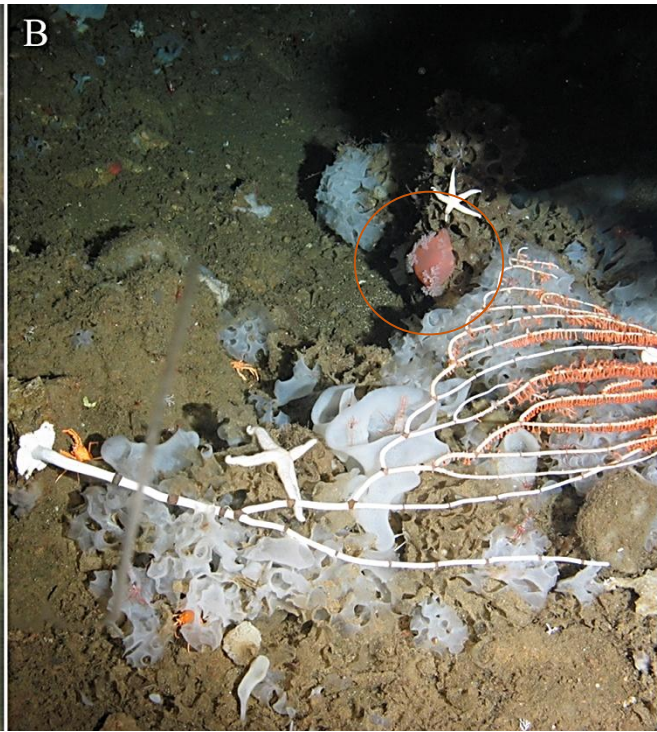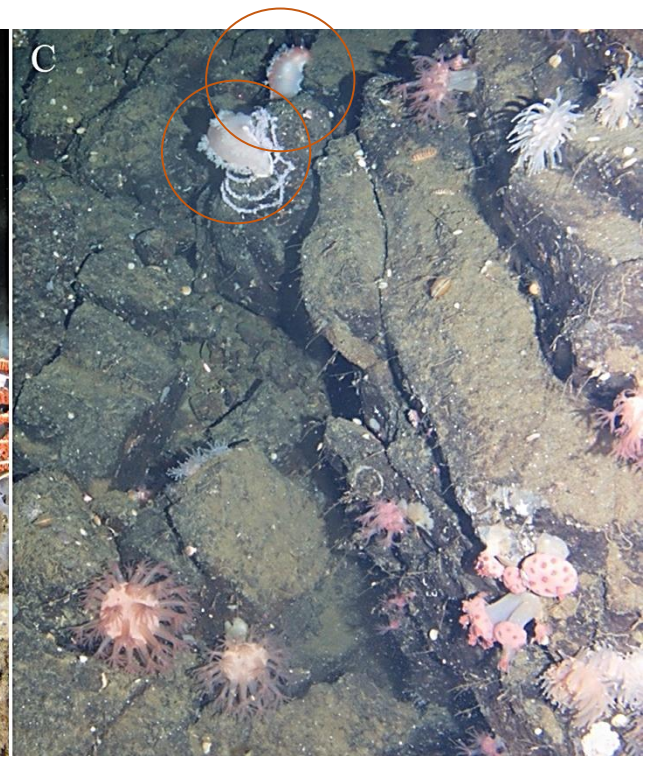

Supplement: peerj-09-12336-s004.pdf [file peerj-09-12336-s004.pdf]
